# Supplementary material
Source: publisher figshare collection journal article supplement (https://sage.figshare.com/ndownloader/files/20780277)
Supplement: Supplementary file 1 [file 20780277]

## Supplementary File

### *Housing structure and occupant behaviour to increase the environmental and health co-benefits of housing: insights from expert interviews in New Zealand*

Aditi Bunker, Till Bärnighausen, Alistair Woodward, Chris Bullen

#### Interview Guide

Brief introduction. Explain project: My interest is in health, housing and design features of houses or products in houses that may benefit occupant health and the environment. In particular I am looking at features that reduce energy use, reduce moisture and mould, (so improve indoor air quality) and also moderate temperatures. I am also looking at how people could be best taught to use these housing attributes to achieve good health and environmental outcomes.

- 1) Could you please briefly describe your role within the organisation you work for?
- 2) Given your experience, have you been involved in any research or work, or are you aware of any research or work that has explored the interaction between homes with such design features or products and the people residing in these dwellings?

What were the key findings from the research you have described?

- 3) Are you aware of how residents, especially those that live in low socioeconomic housing are introduced to these features incorporated within their home?

If yes, please describe what takes place?

- 4) What role do you think people or residents play in order for achieve it's true potential? (True potential refers to co-benefits for the health and the environment.)
- 5) To your knowledge does what people learn (about using such design features or products) impact on their actual practices?
- 6) How would you improve the learning process of the residents, especially for the people that live in social housing?
- 7) What in your view are the most important features that should be incorporated in housing?

Why do you feel these features are most important?

- 8) What benefits and drawbacks do you see from incorporating such features in houses?
- 9) In your opinion, are standards or regulations important for incorporating healthy design or products in homes? Why or why not?
- 10) How do you conceptualise sustainability in the context of housing and health?
